# Supplementary material for: Two hybrid polyoxometalates constructed from Preyssler P5W30 clusters and Schiff base exhibiting interesting third-order NLO properties
Source: Royal Society of Chemistry journal article supplement (doi:10.1039/c7ra12165b), 2017-01-01
Supplement: c7ra12165b1.pdf [file c7ra12165b1.pdf]

## Two novel hybrid polyoxometalates constructed from Preyssler $P_5W_{30}$ clusters and Schiff base exhibiting interesting third-order NLO properties

Jie Shi,<sup>[a]</sup> Yao Xiong,<sup>[a]</sup> Meng-Jie Zhou,<sup>[a]</sup> Lu Chen,<sup>[a]</sup> and Yan Xu\*<sup>[a,b]</sup>

<sup>a</sup>College of Chemistry and Chemical Engineering, State Key Laboratory of Materials-Oriented Chemical Engineering, Nanjing Tech University, Nanjing 210009, P. R. China

<sup>b</sup>Coordination Chemistry Institute, State Key Laboratory of Coordination Chemistry, Nanjing University, Nanjing 210093, PR China

### 1. PXRD patterns

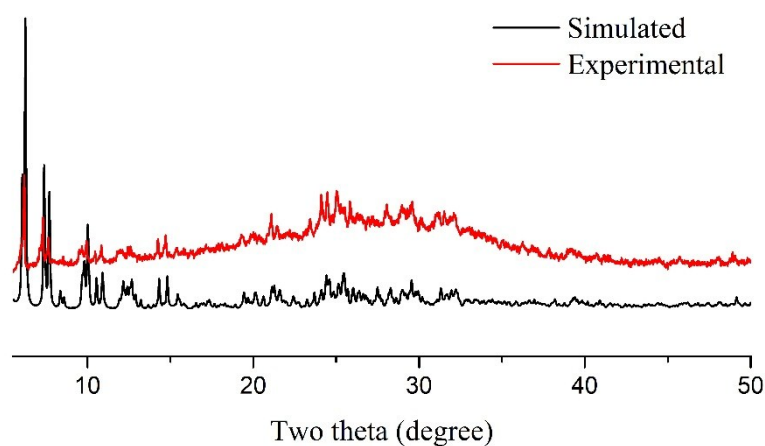

**Fig. S1** The simulative (black) and experimental (red) powder X-ray diffraction patterns for compound **1**.

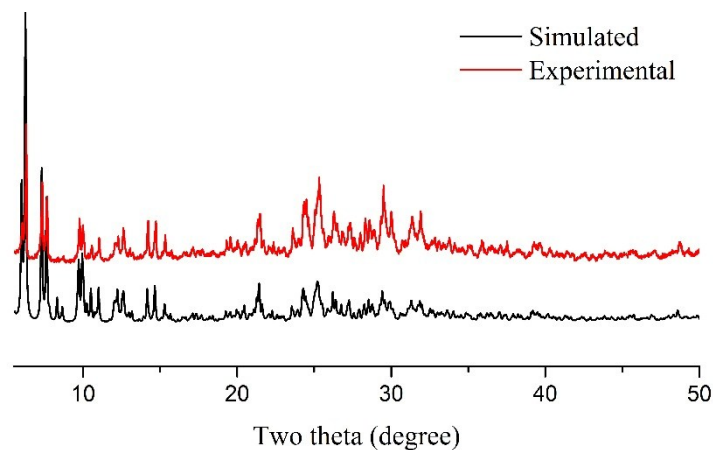

**Fig. S2** The simulative (black) and experimental (red) powder X-ray diffraction

patterns for compound 2.

## 2. IR spectra

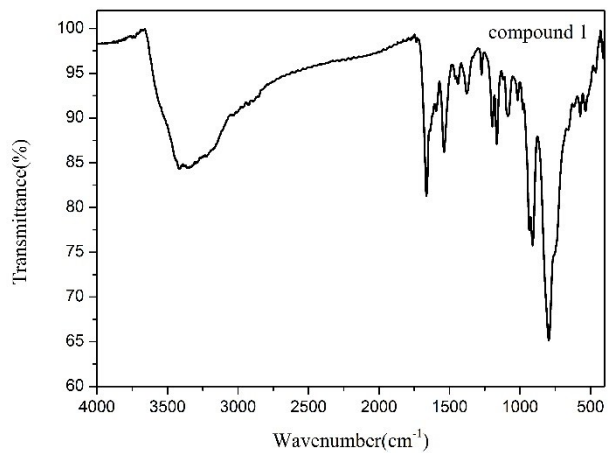

**Fig. S3** The IR spectra of compound 1.

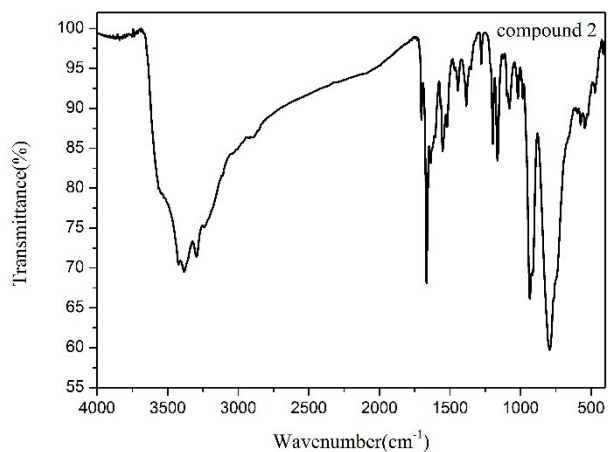

**Fig. S4** The IR spectra of compound 2.

## 3. The TG curves for 1 and 2

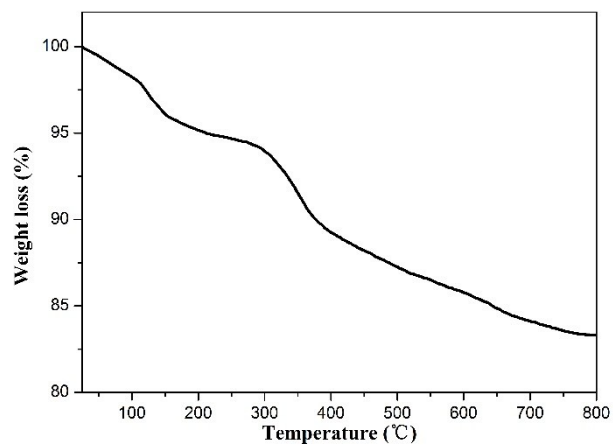

**Fig. S5** The TG curve of compound 1.

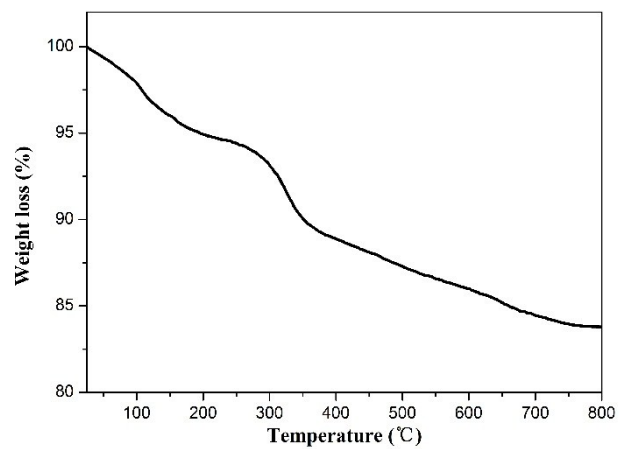

**Fig. S6** The TG curve of compound 2.

#### 4. Microscope images

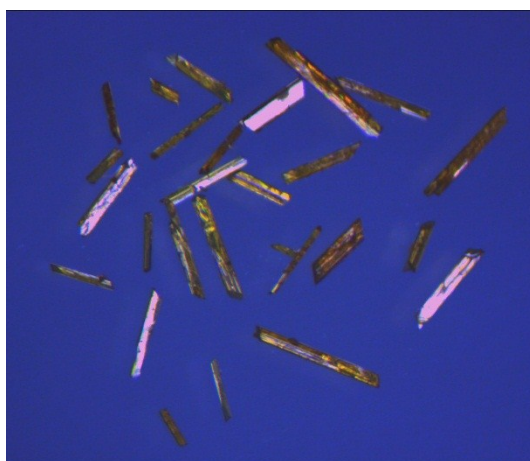

**Fig. S7** Microscope image of compound 1.

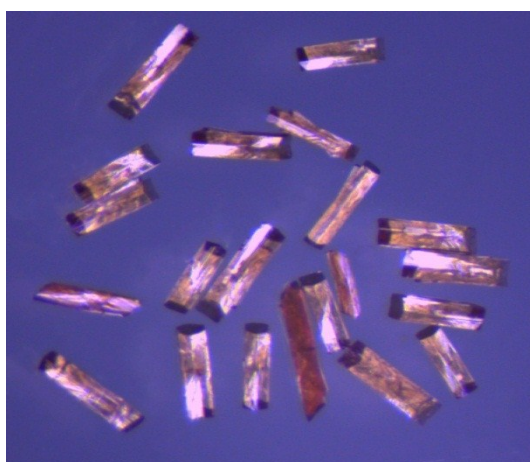

**Fig. S8** Microscope image of compound 2.

## 5. The coordination modes of Transition Metal ions

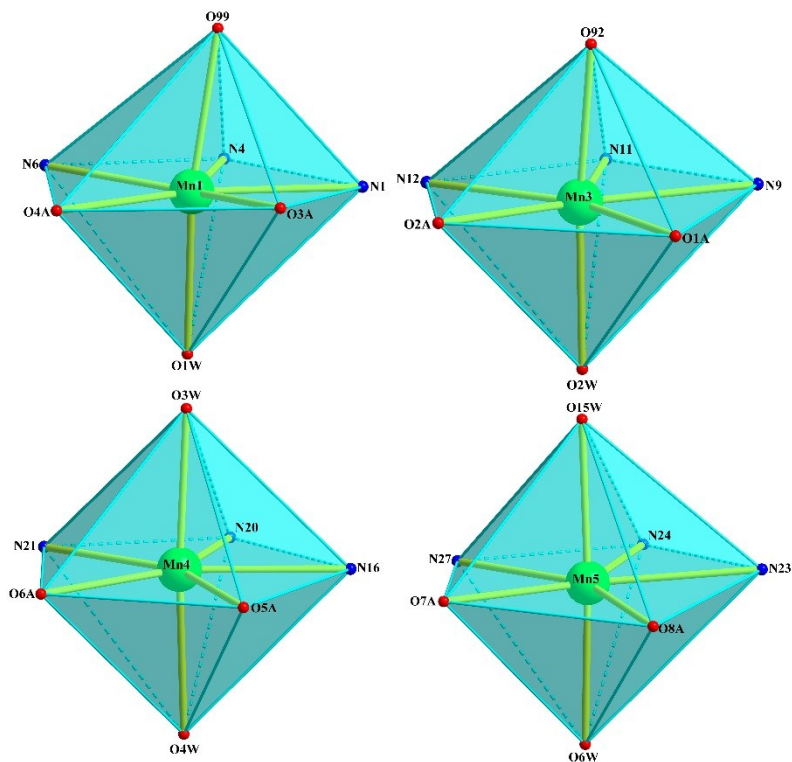

Fig. S9 The coordination modes of Mn ion in compound 1.

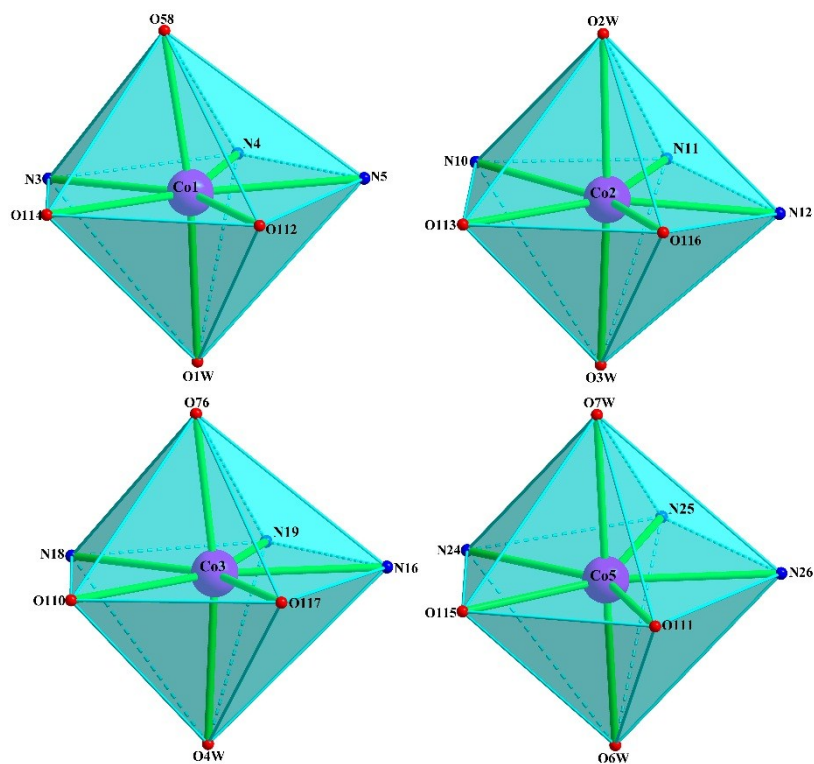

Fig. S10 The coordination modes of Co ion in compound 2.

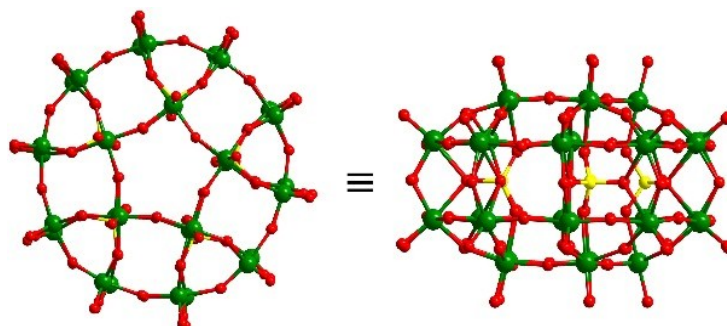

**Fig. S11** Ball-and-stick representation of Preyssler-type  $P_5W_{30}$  anion.

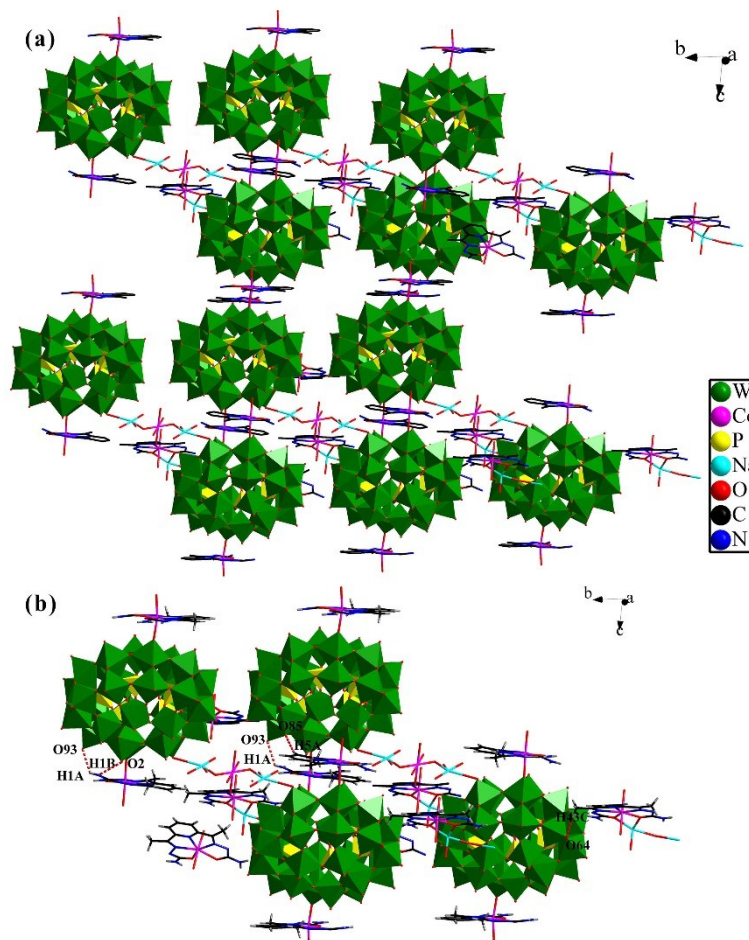

**Fig. S12** (a) Polyhedral and stick representation of the 3D framework of compound **2**, (b) Hydrogen bonds interactions between adjacent clusters of compound **2**.

## 6. Bond Valence Sum Calculations

**Table S1.** Selected bond valence sum (BVS) values for compounds **1** (left) and **2** (right).

| Mn | BVS value | Co | BVS value |
|----|-----------|----|-----------|
|----|-----------|----|-----------|

|     |      |     |      |
|-----|------|-----|------|
| Mn1 | 2.22 | Co1 | 2.21 |
| Mn2 | 2.02 | Co2 | 2.39 |
| Mn3 | 2.25 | Co3 | 2.36 |
| Mn4 | 2.28 | Co4 | 1.80 |
| Mn5 | 2.19 | Co5 | 2.25 |

## 7. Selected bond lengths and angles

**Table S2.** Selected bond lengths (Å) and bond angles (°) for compound **1**.

|                   |           |                   |           |
|-------------------|-----------|-------------------|-----------|
| Mn(1)-O(1W)       | 2.213(16) | Mn(3)-O(1A)       | 2.27(2)   |
| Mn(1)-O(99)       | 2.216(15) | Mn(3)-N(12)       | 2.319(18) |
| Mn(1)-O(3A)       | 2.222(16) | Mn(3)-N(9)        | 2.323(19) |
| Mn(1)-O(4A)       | 2.241(15) | Mn(4)-O(6A)       | 2.156(17) |
| Mn(1)-N(6)        | 2.272(17) | Mn(4)-O(5A)       | 2.22(2)   |
| Mn(1)-N(4)        | 2.275(19) | Mn(4)-O(3W)       | 2.22(2)   |
| Mn(1)-N(1)        | 2.280(16) | Mn(4)-O(4W)       | 2.252(19) |
| Mn(2)-O(7W)       | 2.171(19) | Mn(4)-N(16)       | 2.275(17) |
| Mn(2)-O(7W)#1     | 2.171(19) | Mn(4)-N(20)       | 2.278(18) |
| Mn(2)-O(13W)#1    | 2.204(5)  | Mn(4)-N(21)       | 2.296(19) |
| Mn(2)-O(13W)      | 2.204(5)  | Mn(5)-O(6W)       | 2.20(2)   |
| Mn(2)-O(12W)#1    | 2.205(5)  | Mn(5)-O(7A)       | 2.217(18) |
| Mn(2)-O(12W)      | 2.205(5)  | Mn(5)-O(8A)       | 2.223(18) |
| Mn(3)-O(92)       | 2.129(16) | Mn(5)-N(24)       | 2.25(2)   |
| Mn(3)-O(2W)       | 2.16(2)   | Mn(5)-O(15W)      | 2.25(2)   |
| Mn(3)-O(2A)       | 2.26(2)   | Mn(5)-N(27)       | 2.306(19) |
| Mn(3)-N(11)       | 2.27(2)   | Mn(5)-N(23)       | 2.33(2)   |
| O(1W)-Mn(1)-O(99) | 171.6(6)  | O(2W)-Mn(3)-O(1A) | 88.0(8)   |
| O(1W)-Mn(1)-O(3A) | 98.6(7)   | O(2A)-Mn(3)-O(1A) | 85.3(7)   |
| O(99)-Mn(1)-O(3A) | 81.4(6)   | N(11)-Mn(3)-O(1A) | 139.0(7)  |
| O(1W)-Mn(1)-O(4A) | 91.6(6)   | O(92)-Mn(3)-N(12) | 97.7(7)   |
| O(99)-Mn(1)-O(4A) | 96.7(6)   | O(2W)-Mn(3)-N(12) | 90.8(8)   |
| O(3A)-Mn(1)-O(4A) | 83.4(6)   | O(2A)-Mn(3)-N(12) | 69.9(7)   |
| O(1W)-Mn(1)-N(6)  | 89.4(7)   | N(11)-Mn(3)-N(12) | 65.9(7)   |
| O(99)-Mn(1)-N(6)  | 94.4(6)   | O(1A)-Mn(3)-N(12) | 155.1(8)  |
| O(3A)-Mn(1)-N(6)  | 152.8(6)  | O(92)-Mn(3)-N(9)  | 84.4(6)   |
| O(4A)-Mn(1)-N(6)  | 70.3(6)   | O(2W)-Mn(3)-N(9)  | 92.7(7)   |
| O(1W)-Mn(1)-N(4)  | 85.6(7)   | O(2A)-Mn(3)-N(9)  | 155.9(7)  |
| O(99)-Mn(1)-N(4)  | 88.7(6)   | N(11)-Mn(3)-N(9)  | 68.0(7)   |
| O(3A)-Mn(1)-N(4)  | 137.5(6)  | O(1A)-Mn(3)-N(9)  | 71.0(7)   |
| O(4A)-Mn(1)-N(4)  | 139.0(6)  | N(12)-Mn(3)-N(9)  | 133.9(8)  |

|                         |           |                    |          |
|-------------------------|-----------|--------------------|----------|
| N(6)-Mn(1)-N(4)         | 68.8(6)   | O(6A)-Mn(4)-O(5A)  | 80.5(7)  |
| O(1W)-Mn(1)-N(1)        | 90.2(6)   | O(6A)-Mn(4)-O(3W)  | 94.2(9)  |
| O(99)-Mn(1)-N(1)        | 81.9(6)   | O(5A)-Mn(4)-O(3W)  | 91.1(9)  |
| O(3A)-Mn(1)-N(1)        | 70.2(6)   | O(6A)-Mn(4)-O(4W)  | 90.9(8)  |
| O(4A)-Mn(1)-N(1)        | 153.5(6)  | O(5A)-Mn(4)-O(4W)  | 90.4(8)  |
| N(6)-Mn(1)-N(1)         | 136.1(7)  | O(3W)-Mn(4)-O(4W)  | 174.8(8) |
| N(4)-Mn(1)-N(1)         | 67.4(6)   | O(6A)-Mn(4)-N(16)  | 151.4(8) |
| O(7W)-Mn(2)-O(7W)#1     | 180       | O(5A)-Mn(4)-N(16)  | 70.9(7)  |
| O(7W)-Mn(2)-O(13W)#1    | 85.9(10)  | O(3W)-Mn(4)-N(16)  | 88.0(8)  |
| O(7W)#1-Mn(2)-O(13W)#1  | 94.1(10)  | O(4W)-Mn(4)-N(16)  | 87.8(6)  |
| O(7W)-Mn(2)-O(13W)      | 94.1(10)  | O(6A)-Mn(4)-N(20)  | 138.9(7) |
| O(7W)#1-Mn(2)-O(13W)    | 85.9(10)  | O(5A)-Mn(4)-N(20)  | 140.2(7) |
| O(13W)#1-Mn(2)-O(13W)   | 180       | O(3W)-Mn(4)-N(20)  | 90.6(9)  |
| O(7W)-Mn(2)-O(12W)#1    | 87.0(10)  | O(4W)-Mn(4)-N(20)  | 85.1(7)  |
| O(7W)#1-Mn(2)-O(12W)#1  | 93.0(10)  | N(16)-Mn(4)-N(20)  | 69.5(7)  |
| O(13W)#1-Mn(2)-O(12W)#1 | 112.2(15) | O(6A)-Mn(4)-N(21)  | 70.5(7)  |
| O(13W)-Mn(2)-O(12W)#1   | 67.8(15)  | O(5A)-Mn(4)-N(21)  | 151.0(7) |
| O(7W)-Mn(2)-O(12W)      | 93.0(10)  | O(3W)-Mn(4)-N(21)  | 92.5(9)  |
| O(7W)#1-Mn(2)-O(12W)    | 87.0(10)  | O(4W)-Mn(4)-N(21)  | 88.6(7)  |
| O(13W)#1-Mn(2)-O(12W)   | 67.8(15)  | N(16)-Mn(4)-N(21)  | 138.0(7) |
| O(13W)-Mn(2)-O(12W)     | 112.2(15) | N(20)-Mn(4)-N(21)  | 68.5(7)  |
| O(12W)#1-Mn(2)-O(12W)   | 180       | O(6W)-Mn(5)-O(7A)  | 88.9(7)  |
| O(7W)-Mn(2)-Na(3)#1     | 90.0(6)   | O(6W)-Mn(5)-O(8A)  | 86.8(8)  |
| O(7W)#1-Mn(2)-Na(3)#1   | 90.0(6)   | O(7A)-Mn(5)-O(8A)  | 83.5(7)  |
| O(13W)#1-Mn(2)-Na(3)#1  | 144.6(11) | O(6W)-Mn(5)-N(24)  | 91.8(8)  |
| O(13W)-Mn(2)-Na(3)#1    | 35.4(11)  | O(7A)-Mn(5)-N(24)  | 138.3(7) |
| O(12W)#1-Mn(2)-Na(3)#1  | 32.4(11)  | O(8A)-Mn(5)-N(24)  | 138.2(8) |
| O(12W)-Mn(2)-Na(3)#1    | 147.6(11) | O(6W)-Mn(5)-O(15W) | 177.0(8) |
| O(7W)-Mn(2)-Na(3)       | 90.0(6)   | O(7A)-Mn(5)-O(15W) | 88.3(8)  |
| O(7W)#1-Mn(2)-Na(3)     | 90.0(6)   | O(8A)-Mn(5)-O(15W) | 93.9(8)  |
| O(13W)#1-Mn(2)-Na(3)    | 35.4(11)  | N(24)-Mn(5)-O(15W) | 89.6(8)  |
| O(13W)-Mn(2)-Na(3)      | 144.6(11) | O(6W)-Mn(5)-N(27)  | 88.3(7)  |
| O(12W)#1-Mn(2)-Na(3)    | 147.6(11) | O(7A)-Mn(5)-N(27)  | 70.6(7)  |
| O(12W)-Mn(2)-Na(3)      | 32.4(11)  | O(8A)-Mn(5)-N(27)  | 153.7(7) |
| Na(3)#1-Mn(2)-Na(3)     | 180       | N(24)-Mn(5)-N(27)  | 67.7(7)  |
| O(92)-Mn(3)-O(2W)       | 170.6(8)  | O(15W)-Mn(5)-N(27) | 89.8(8)  |
| O(92)-Mn(3)-O(2A)       | 88.7(7)   | O(6W)-Mn(5)-N(23)  | 95.6(7)  |
| O(2W)-Mn(3)-O(2A)       | 90.4(8)   | O(7A)-Mn(5)-N(23)  | 151.9(8) |
| O(92)-Mn(3)-N(11)       | 94.0(7)   | O(8A)-Mn(5)-N(23)  | 69.1(8)  |
| O(2W)-Mn(3)-N(11)       | 93.1(9)   | N(24)-Mn(5)-N(23)  | 69.4(8)  |
| O(2A)-Mn(3)-N(11)       | 135.7(7)  | O(15W)-Mn(5)-N(23) | 87.4(8)  |
| O(92)-Mn(3)-O(1A)       | 82.6(7)   | N(27)-Mn(5)-N(23)  | 137.1(8) |

Symmetry transformations used to generate equivalent atoms: #1  $-x-2, -y+2, -z+2$ .



**Table S3.** Selected bond lengths (Å) and bond angles (°) for compound **2**.

|                     |           |                         |             |
|---------------------|-----------|-------------------------|-------------|
| Co(1)-O(58)         | 2.114(16) | Co(3)-N(19)             | 2.16(3)     |
| Co(1)-O(1W)         | 2.19(2)   | Co(3)-O(110)            | 2.20(3)     |
| Co(1)-O(112)        | 2.19(2)   | Co(3)-N(18)             | 2.20(3)     |
| Co(1)-N(3)          | 2.19(2)   | Co(3)-O(117)            | 2.22(2)     |
| Co(1)-N(4)          | 2.21(2)   | Co(4)-O(27W)#1          | 1.99(3)     |
| Co(1)-N(5)          | 2.21(2)   | Co(4)-O(27W)            | 1.99(3)     |
| Co(1)-O(114)        | 2.24(2)   | Co(4)-O(11W)#1          | 2.13(2)     |
| Co(2)-O(3W)         | 2.15(2)   | Co(4)-O(11W)            | 2.13(2)     |
| Co(2)-O(113)        | 2.16(2)   | Co(4)-O(30W)#1          | 2.40(5)     |
| Co(2)-N(10)         | 2.16(2)   | Co(4)-O(30W)            | 2.40(5)     |
| Co(2)-O(2W)         | 2.17(2)   | Co(5)-O(115)            | 2.14(2)     |
| Co(2)-O(116)        | 2.17(2)   | Co(5)-O(111)            | 2.16(2)     |
| Co(2)-N(11)         | 2.17(3)   | Co(5)-N(25)             | 2.17(2)     |
| Co(2)-N(12)         | 2.17(2)   | Co(5)-O(6W)             | 2.17(3)     |
| Co(3)-O(76)         | 2.068(18) | Co(5)-O(7W)             | 2.18(2)     |
| Co(3)-O(4W)         | 2.14(3)   | Co(5)-N(26)             | 2.21(2)     |
| Co(3)-N(16)         | 2.15(2)   | Co(5)-N(24)             | 2.23(3)     |
| O(58)-Co(1)-O(1W)   | 173.6(8)  | O(76)-Co(3)-N(18)       | 87.8(8)     |
| O(58)-Co(1)-O(112)  | 93.6(7)   | O(4W)-Co(3)-N(18)       | 90.1(10)    |
| O(1W)-Co(1)-O(112)  | 88.9(8)   | N(16)-Co(3)-N(18)       | 140.5(10)   |
| O(58)-Co(1)-N(3)    | 85.0(8)   | N(19)-Co(3)-N(18)       | 71.4(10)    |
| O(1W)-Co(1)-N(3)    | 89.7(9)   | O(110)-Co(3)-N(18)      | 71.3(9)     |
| O(112)-Co(1)-N(3)   | 148.5(8)  | O(76)-Co(3)-O(117)      | 88.7(8)     |
| O(58)-Co(1)-N(4)    | 91.2(7)   | O(4W)-Co(3)-O(117)      | 87.1(10)    |
| O(1W)-Co(1)-N(4)    | 90.5(8)   | N(16)-Co(3)-O(117)      | 71.6(9)     |
| O(112)-Co(1)-N(4)   | 140.8(7)  | N(19)-Co(3)-O(117)      | 140.7(9)    |
| N(3)-Co(1)-N(4)     | 70.6(8)   | O(110)-Co(3)-O(117)     | 76.7(8)     |
| O(58)-Co(1)-N(5)    | 94.9(7)   | N(18)-Co(3)-O(117)      | 147.9(9)    |
| O(1W)-Co(1)-N(5)    | 91.5(8)   | O(27W)#1-Co(4)-O(27W)   | 179.999(15) |
| O(112)-Co(1)-N(5)   | 70.4(8)   | O(27W)#1-Co(4)-O(11W)#1 | 87.7(12)    |
| N(3)-Co(1)-N(5)     | 141.0(9)  | O(27W)-Co(4)-O(11W)#1   | 92.3(12)    |
| N(4)-Co(1)-N(5)     | 70.4(8)   | O(27W)#1-Co(4)-O(11W)   | 92.3(12)    |
| O(58)-Co(1)-O(114)  | 83.2(7)   | O(27W)-Co(4)-O(11W)     | 87.7(12)    |
| O(1W)-Co(1)-O(114)  | 91.7(8)   | O(11W)#1-Co(4)-O(11W)   | 180         |
| O(112)-Co(1)-O(114) | 77.9(7)   | O(11W)#1-Co(4)-O(30W)#1 | 85.0(14)    |
| N(3)-Co(1)-O(114)   | 70.7(8)   | O(11W)-Co(4)-O(30W)#1   | 95.0(14)    |
| N(4)-Co(1)-O(114)   | 141.2(8)  | O(11W)#1-Co(4)-O(30W)   | 95.0(14)    |
| N(5)-Co(1)-O(114)   | 148.1(9)  | O(11W)-Co(4)-O(30W)     | 85.0(14)    |
| O(3W)-Co(2)-O(113)  | 87.9(8)   | O(30W)#1-Co(4)-O(30W)   | 179.999(12) |



|                     |           |                        |           |
|---------------------|-----------|------------------------|-----------|
| O(3W)-Co(2)-N(10)   | 91.4(10)  | O(11W)#1-Co(4)-Na(2)   | 89.9(8)   |
| O(113)-Co(2)-N(10)  | 72.9(9)   | O(11W)-Co(4)-Na(2)     | 90.1(8)   |
| O(3W)-Co(2)-O(2W)   | 176.2(9)  | O(30W)#1-Co(4)-Na(2)   | 87.4(15)  |
| O(113)-Co(2)-O(2W)  | 88.3(9)   | O(30W)-Co(4)-Na(2)     | 92.6(15)  |
| N(10)-Co(2)-O(2W)   | 87.2(10)  | O(11W)#1-Co(4)-Na(2)#1 | 90.1(8)   |
| O(3W)-Co(2)-O(116)  | 94.0(9)   | O(11W)-Co(4)-Na(2)#1   | 89.9(8)   |
| O(113)-Co(2)-O(116) | 75.8(8)   | O(30W)#1-Co(4)-Na(2)#1 | 92.6(15)  |
| N(10)-Co(2)-O(116)  | 148.0(10) | O(30W)-Co(4)-Na(2)#1   | 87.4(15)  |
| O(2W)-Co(2)-O(116)  | 85.4(9)   | Na(2)-Co(4)-Na(2)#1    | 180.0(7)  |
| O(3W)-Co(2)-N(11)   | 90.2(9)   | O(115)-Co(5)-O(111)    | 74.1(8)   |
| O(113)-Co(2)-N(11)  | 143.1(9)  | O(115)-Co(5)-N(25)     | 141.5(9)  |
| N(10)-Co(2)-N(11)   | 70.3(10)  | O(111)-Co(5)-N(25)     | 144.0(9)  |
| O(2W)-Co(2)-N(11)   | 92.6(10)  | O(115)-Co(5)-O(6W)     | 91.3(10)  |
| O(116)-Co(2)-N(11)  | 141.0(9)  | O(111)-Co(5)-O(6W)     | 89.6(10)  |
| O(3W)-Co(2)-N(12)   | 87.3(8)   | N(25)-Co(5)-O(6W)      | 94.1(11)  |
| O(113)-Co(2)-N(12)  | 146.8(8)  | O(115)-Co(5)-O(7W)     | 88.4(8)   |
| N(10)-Co(2)-N(12)   | 140.1(10) | O(111)-Co(5)-O(7W)     | 88.9(8)   |
| O(2W)-Co(2)-N(12)   | 96.0(8)   | N(25)-Co(5)-O(7W)      | 87.0(9)   |
| O(116)-Co(2)-N(12)  | 71.7(8)   | O(6W)-Co(5)-O(7W)      | 178.5(10) |
| N(11)-Co(2)-N(12)   | 69.8(9)   | O(115)-Co(5)-N(26)     | 145.6(8)  |
| O(76)-Co(3)-O(4W)   | 168.4(10) | O(111)-Co(5)-N(26)     | 71.5(8)   |
| O(76)-Co(3)-N(16)   | 95.0(8)   | N(25)-Co(5)-N(26)      | 72.7(9)   |
| O(4W)-Co(3)-N(16)   | 93.9(10)  | O(6W)-Co(5)-N(26)      | 89.3(9)   |
| O(76)-Co(3)-N(19)   | 94.9(9)   | O(7W)-Co(5)-N(26)      | 90.2(8)   |
| O(4W)-Co(3)-N(19)   | 95.1(11)  | O(115)-Co(5)-N(24)     | 71.0(9)   |
| N(16)-Co(3)-N(19)   | 69.1(9)   | O(111)-Co(5)-N(24)     | 145.1(9)  |
| O(76)-Co(3)-O(110)  | 85.4(8)   | N(25)-Co(5)-N(24)      | 70.7(9)   |
| O(4W)-Co(3)-O(110)  | 83.2(10)  | O(6W)-Co(5)-N(24)      | 91.4(11)  |
| N(16)-Co(3)-O(110)  | 148.2(9)  | O(7W)-Co(5)-N(24)      | 89.9(9)   |
| N(19)-Co(3)-O(110)  | 142.6(9)  | N(26)-Co(5)-N(24)      | 143.4(9)  |

Symmetry transformations used to generate equivalent atoms: #1 -x-2,-y+4,-z+2.

## 8. Hydrogen bonds for compounds 1 and 2

**Table S4.** Hydrogen bonds for compound 1 [ $\text{\AA}$  and  $^\circ$ ].

| D-H...A         | d(D-H) | d(H...A) | d(D...A) | $\angle$ (DHA) |
|-----------------|--------|----------|----------|----------------|
| N3-H3B...O96    | 0.86   | 2.47     | 3.07(3)  | 127            |
| N3-H3C...O2     | 0.86   | 2.48     | 3.07(3)  | 126            |
| N14-H14A...O19W | 0.86   | 2.17     | 2.97(4)  | 155            |
| N14-H14B...O97  | 0.86   | 2.52     | 3.34(3)  | 159            |
| C2-H2A...O62    | 0.93   | 2.33     | 3.10(3)  | 140            |
| C11-H11B...O7   | 0.96   | 2.43     | 3.23(3)  | 141            |
| C17-H17A...O82  | 0.93   | 2.48     | 3.20(4)  | 134            |

|                |      |      |         |     |
|----------------|------|------|---------|-----|
| C22-H22B...O44 | 0.96 | 2.59 | 3.24(4) | 126 |
|----------------|------|------|---------|-----|

**Table S5.** Hydrogen bonds for compound **2** [Å and °].

| D-H...A         | d(D-H) | d(H...A) | d(D...A) | ∠(DHA) |
|-----------------|--------|----------|----------|--------|
| N1-H1A...O93    | 0.86   | 2.46     | 3.03(3)  | 124    |
| N1-H1B...O2     | 0.86   | 2.56     | 3.16(3)  | 127    |
| N21-H21B...O78  | 0.86   | 2.55     | 3.23(4)  | 136    |
| N22-H22E...O3   | 0.86   | 2.26     | 3.07(4)  | 157    |
| N28-H28B...O19W | 0.86   | 2.36     | 3.14(5)  | 150    |
| C5-H5A...O85    | 0.93   | 2.17     | 3.00(4)  | 148    |
| C11-H11C...O53  | 0.96   | 2.44     | 3.14(4)  | 130    |
| C17-H17A...O75  | 0.93   | 2.57     | 3.13(4)  | 119    |
| C26-H26A...O109 | 0.93   | 2.38     | 3.14(5)  | 139    |
| C43-H43C...O64  | 0.96   | 2.41     | 3.34(5)  | 163    |

## 9. The treatment for H atoms during the refinement

Hydrogen atoms of the Schiff-base ligands were geometrically placed and refined with a riding model. The hydrogen atoms on water molecules were not included and only put into the final molecular formula.

## 10. The explanation of structural refinement

Since P5W30 cluster anions are very huge, LARGE Solvent Accessible VOID is found in both Structures. Which are common in the structures of polyoxometalates. Also the H atoms were not located.
